# Supplementary material for: Selection of suitable reference genes for gene expression studies in HMC3 cell line by quantitative real-time RT-PCR
Source: Springer Nature journal article supplement (doi:10.1038/s41598-024-52415-7), 2024-01-29
Supplement: MOESM1 [file 41598_2024_52415_MOESM1_ESM.xlsx]

## Sheet: S2
	CTR			6-OHDA			Rotenone			IFNγ+glucose
	#1	#2	#3	#1	#2	#3	#1	#2	#3	#1	#2	#3
ACTB	15.1877	15.3198	14.3735	19.009	15.268	14.8687	15.7617	15.3661	15.6759	18.1903	14.3005	15.8602
B2M	17.32	16.3379	16.3983	17.0731	16.0764	16.2891	15.8686	16.078	16.1918	16.8097	16.1197	16.131
GAPDH	14.0665	13.5332	13.5377	15.4084	13.809	18.9522	14.0215	14.0359	13.9799	14.899	13.1733	13.9981
HMBS	24.1082	23.6203	25.0596	26.6082	23.5368	26.4837	23.643	23.5801	24.263	27.2817	24.069	24.4599
HPRT1	20.0815	20.3732	19.9167	20.4372	20.007	20.5316	20.1706	20.0965	20.4673	20.6663	19.7788	20.4422
RPL13	15.4803	15.0577	15.1037	15.1521	15.0492	15.2108	14.9835	15.1791	14.7683	17.7781	14.7597	15.319
RPS18	13.5081	13.7259	13.3099	13.4489	13.9388	14.2302	13.3987	13.8502	13.3367	13.5475	13.5915	14.1253
TBP	22.9987	22.7437	23.167	23.9475	23.2182	24.8567	23.7596	23.5022	22.9512	24.0656	23.991	23.2131
TMEM199	20.2996	22.4844	21.1583	21.8411	21.4267	23.295	21.9928	21.7601	21.5051	21.9785	21.1251	21.8303
YWHAZ	21.0925	20.7296	20.5328	23.2212	21.5298	20.483	21.1798	20.9821	21.1119	23.0025	20.4285	21.2053

## Sheet: S3
		CTR			6-OHDA			Rotenone			IFNγ+glucose
	Cq min	#1	#2	#3	#1	#2	#3	#1	#2	#3	#1	#2	#3
ACTB	14.3005	0.887174	1.01929	0.0730203	4.70854	0.967548	0.568252	1.46122	1.06559	1.37536	3.88984	0	1.55973
B2M	15.8686	1.45139	0.469304	0.529711	1.20446	0.207757	0.42051	0	0.209406	0.323231	0.941074	0.251139	0.262363
GAPDH	13.1733	0.893243	0.359865	0.364429	2.23509	0.635649	5.7789	0.848166	0.862582	0.806593	1.72569	0	0.824834
HMBS	23.5368	0.571381	0.0834543	1.52274	3.07142	0	2.94683	0.106172	0.0433225	3.74489	3.74489	0.532161	0.923086
HPRT1	19.7788	0.302774	0.594395	0.137939	0.658465	0.228238	0.752779	0.391841	0.317741	0.68856	0.887485	0	0.663473
RPL13	14.7597	0.720616	0.298	0.344011	0.392425	0.289493	0.451076	0.223817	0.419421	0.00864274	3.01843	0	0.559342
RPS18	13.3099	0.198189	0.415939	0	0.139007	0.628899	0.92028	0.0887543	0.540217	0.026774	0.237513	0.28157	0.815406
TBP	22.7437	0.255024	0.423302	0	1.20382	2.11304	0.474478	1.01585	0.207499	0.75849	1.32195	0.469441	1.24727
TMEM199	20.2996	0	2.18479	0.85867	1.54144	1.12707	2.99533	1.69314	1.46047	1.20552	1.67891	0.825475	1.53064
YWHAZ	20.4285	0.663959	0.301085	0.104239	2.79262	1.10123	0.0544981	0.751297	0.553596	0.683321	2.574	0	0.776748

## Sheet: S4
	CTR			6-OHDA			Rotenone			IFN-γ+glucose
	#1	#2	#3	#1	#2	#3	#1	#2	#3	#1	#2	#3	SD	SD Mean
ACTB vs TBP	-7.81106	-7.84722	-7.42392	-4.93849	-9.5887	-7.95014	-7.99785	-7.58512	-8.49424	-5.87531	-8.91265	-8.13074	1.24616	1.29182
ACTB vs B2M	-2.13232	-1.01812	-2.02479	1.93598	-0.808312	-1.42036	-0.106888	-0.711923	-0.515971	1.38067	-1.81924	-0.270737	1.26034
ACTB vs GAPDH	1.12112	1.78661	1.78661	3.60064	1.45909	-4.08346	1.74024	1.33019	1.69596	3.29134	1.12719	1.86208	1.89171
ACTB vs YWHAZ	-5.90483	-5.40984	-6.15926	-4.21212	-6.26173	-5.61429	-5.41812	-5.61605	-5.436	-4.8122	-6.12804	-5.34506	0.585114
ACTB vs RPL13	-0.292623	0.262107	-0.730172	3.85693	0.218873	-0.342006	0.778217	0.186984	0.907539	0.412231	-0.459182	0.541206	1.18666
ACTB vs HMBS	-8.92054	-8.30049	-10.686	-7.5992	-8.26878	-11.6149	-7.88129	-8.21407	-8.58713	-9.09138	-9.76849	-8.59969	1.18528
ACTB vs RPS18	1.67954	1.59391	1.06358	5.56009	1.3292	0.638528	2.36302	1.51592	2.33915	4.64289	0.708986	1.73488	1.51391
ACTB vs HPRT1	-4.89388	-5.05339	-5.5432	-1.42821	-4.73897	-5.66281	-4.40891	-4.73044	-4.79148	-2.47592	-5.47828	-4.58203	1.26484
ACTB vs TMEM199	-5.11195	-7.16463	-6.78478	-2.83202	-6.15865	-8.42621	-6.23106	-6.39401	-5.82928	-3.7882	-6.8246	-5.97004	1.4924
	CTR			6-OHDA			Rotenone			IFN-γ+glucose
	#1	#2	#3	#1	#2	#3	#1	#2	#3	#1	#2	#3	SD	SD Mean
B2M vs TBP	-6.27211	-7.57663	-7.12308	-7.5142	-6.8814	-8.22291	-7.66121	-7.28732	-7.78232	-7.28525	-7.01948	-6.57857	0.527164	0.898804
B2M vs GAPDH	3.25343	1.87872	2.80473	1.66466	2.81896	2.2674	1.84712	1.83	2.04212	1.91068	3.24165	2.94643	1.35415
B2M vs ACTB	2.13232	-2.05235	1.01812	-1.93598	2.03098	0.808312	0.106888	0.610644	0.711923	-1.38067	-1.4628	1.81924	1.46573
B2M vs YWHAZ	-3.77251	-6.29267	-4.39172	-6.1481	-4.19359	-5.45341	-5.31124	-5.73014	-4.90413	-6.19287	-4.50965	-4.3088	0.829964
B2M vs RPL13	1.83969	1.95389	1.28023	1.92096	1.12678	1.02719	0.885105	0.991002	0.898907	-0.968435	1.44023	1.36006	0.697152
B2M vs HMBS	-6.78822	-9.99332	-7.28238	-9.53518	-7.56283	-7.46047	-7.7744	-7.38145	-7.50214	-10.472	-9.93566	-7.94925	1.23431
B2M vs RPS18	3.81186	3.72293	2.61202	3.62411	2.68141	2.13752	2.4699	1.83052	2.22785	3.26222	2.8133	2.52823	0.66089
B2M vs HPRT1	-2.76157	-3.91979	-4.03527	-3.36419	-3.85684	-3.93066	-4.30202	-4.08133	-4.01851	-3.85659	-3.62346	-3.65904	0.418281
B2M vs TMEM199	-2.97964	-5.12716	-6.14651	-4.768	-5.20197	-5.35034	-6.12417	-6.23864	-5.68209	-5.16886	-6.22498	-5.00536	0.901595
	CTR			6-OHDA			Rotenone			IFN-γ+glucose
	#1	#2	#3	#1	#2	#3	#1	#2	#3	#1	#2	#3	SD	SD Mean
GAPDH vs TBP	-9.52555	-9.45535	-9.92781	-9.17886	-9.70036	-10.4903	-9.50834	-9.11732	-9.82444	-9.19593	-10.2611	-9.525	1.18556	1.39252
GAPDH vs B2M	-3.25343	-1.87872	-2.80473	-1.66466	-2.81896	-2.2674	-1.84712	-1.83	-2.04212	-1.91068	-3.24165	-2.94643	1.36788
GAPDH vs ACTB	-1.12112	-3.93107	-1.78661	-3.60064	-0.787979	-1.45909	-1.74024	-1.21935	-1.33019	-3.29134	-4.70445	-1.12719	1.93669
GAPDH vs YWHAZ	-7.02595	-8.17139	-7.19645	-7.81275	-7.01256	-7.72081	-7.15836	-7.56013	-6.94624	-8.10355	-7.7513	-7.25523	1.52167
GAPDH vs RPL13	-1.41374	0.0751757	-1.5245	0.256298	-1.69218	-1.24021	-0.96202	-0.838996	-1.14321	-2.87911	-1.80143	-1.58637	1.44046
GAPDH vs HMBS	-10.0417	-11.872	-10.0871	-11.1998	-10.3818	-9.72787	-9.62152	-9.21145	-9.54426	-12.3827	-13.1773	-10.8957	1.35357
GAPDH vs RPS18	0.558422	1.84421	-0.192706	1.95945	-0.137549	-0.129882	0.62278	0.000520101	0.185733	1.35154	-0.428353	-0.418201	1.31353
GAPDH vs HPRT1	-6.015	-5.79851	-6.84	-5.02884	-6.6758	-6.19806	-6.14915	-5.91132	-6.06063	-5.76727	-6.86512	-6.60547	1.24953
GAPDH vs TMEM199	-6.23307	-7.00588	-8.95124	-6.43266	-8.02093	-7.61773	-7.97129	-8.06864	-7.72421	-7.07954	-9.46663	-7.95179	1.1638
	CTR			6-OHDA			Rotenone			IFN-γ+glucose
	#1	#2	#3	#1	#2	#3	#1	#2	#3	#1	#2	#3	SD	SD Mean
HMBS vs TBP	0.516107	2.41668	0.1593	2.02098	0.681437	-0.762439	0.113185	0.0941301	-0.280179	3.18679	2.91618	1.37068	1.21032	1.25731
HMBS vs B2M	6.78822	9.99332	7.28238	9.53518	7.56283	7.46047	7.7744	7.38145	7.50214	10.472	9.93566	7.94925	1.20372
HMBS vs GAPDH	10.0417	11.872	10.0871	11.1998	10.3818	9.72787	9.62152	9.21145	9.54426	12.3827	13.1773	10.8957	1.35357
HMBS vs ACTB	8.92054	7.94096	8.30049	7.5992	9.59382	8.26878	7.88129	7.9921	8.21407	9.09138	8.47287	9.76849	1.09115
HMBS vs YWHAZ	3.01571	3.70064	2.89066	3.38709	3.36924	2.00706	2.46316	1.65131	2.59801	4.27917	5.42602	3.64045	1.15503
HMBS vs RPL13	8.62791	11.9472	8.5626	11.4561	8.68962	8.48766	8.6595	8.37245	8.40105	9.50361	11.3759	9.30931	1.24521
HMBS vs RPS18	10.6001	13.7162	9.8944	13.1593	10.2442	9.59799	10.2443	9.21197	9.72999	13.7343	12.749	10.4775	1.51217
HMBS vs HPRT1	4.02665	6.07352	3.24711	6.171	3.706	3.52981	3.47238	3.30012	3.48363	6.61545	6.3122	4.29021	1.24192
HMBS vs TMEM199	3.80858	4.86616	1.13586	4.76718	2.36086	2.11013	1.65023	1.14281	1.82005	5.30318	3.71068	2.94389	1.30266
	CTR			6-OHDA			Rotenone			IFN-γ+glucose
	#1	#2	#3	#1	#2	#3	#1	#2	#3	#1	#2	#3	SD	SD Mean
HPRT1 vs TBP	-3.51055	-3.65684	-3.08781	-4.15002	-3.02456	-4.29225	-3.35919	-3.20599	-3.76381	-3.42866	-3.39602	-2.91953	0.388199	0.806287
HPRT1 vs B2M	2.76157	3.91979	4.03527	3.36419	3.85684	3.93066	4.30202	4.08133	4.01851	3.85659	3.62346	3.65904	0.407986
HPRT1 vs GAPDH	6.015	5.79851	6.84	5.02884	6.6758	6.19806	6.14915	5.91132	6.06063	5.76727	6.86512	6.60547	1.24953
HPRT1 vs ACTB	4.89388	1.86744	5.05339	1.42821	5.88782	4.73897	4.40891	4.69197	4.73044	2.47592	2.16067	5.47828	1.44119
HPRT1 vs YWHAZ	-1.01095	-2.37288	-0.356449	-2.78391	-0.336758	-1.52275	-1.00922	-1.64881	-0.885616	-2.33628	-0.886182	-0.64976	0.807567
HPRT1 vs RPL13	4.60126	5.87369	5.3155	5.28514	4.98362	4.95785	5.18713	5.07233	4.91742	2.88816	5.06369	5.0191	0.645877
HPRT1 vs HMBS	-4.02665	-6.07352	-3.24711	-6.171	-3.706	-3.52981	-3.47238	-3.30012	-3.48363	-6.61545	-6.3122	-4.29021	1.24192
HPRT1 vs RPS18	6.57342	7.64272	6.64729	6.9883	6.53825	6.06818	6.77192	5.91185	6.24636	7.11881	6.43676	6.18727	0.452557
HPRT1 vs TMEM199	-0.218073	-1.20736	-2.11124	-1.40382	-1.34514	-1.41968	-1.82215	-2.15732	-1.66358	-1.31227	-2.60152	-1.34632	0.621755
	CTR			6-OHDA			Rotenone			IFN-γ+glucose
	#1	#2	#3	#1	#2	#3	#1	#2	#3	#1	#2	#3	SD	SD Mean
RPL13 vs TBP	-8.11181	-9.53053	-8.4033	-9.43516	-8.00818	-9.25009	-8.54632	-8.27832	-8.68123	-6.31681	-8.45971	-7.93863	0.755394	0.992354
RPL13 vs B2M	-1.83969	-1.95389	-1.28023	-1.92096	-1.12678	-1.02719	-0.885105	-0.991002	-0.898907	0.968435	-1.44023	-1.36006	0.670252
RPL13 vs GAPDH	1.41374	-0.0751757	1.5245	-0.256298	1.69218	1.24021	0.96202	0.838996	1.14321	2.87911	1.80143	1.58637	1.44046
RPL13 vs ACTB	0.292623	-4.00625	-0.262107	-3.85693	0.904199	-0.218873	-0.778217	-0.380358	-0.186984	-0.412231	-2.90302	0.459182	1.52125
RPL13 vs YWHAZ	-5.6122	-8.24657	-5.67195	-8.06905	-5.32038	-6.4806	-6.19634	-6.72114	-5.80304	-5.22444	-5.94987	-5.66886	0.907445
RPL13 vs HMBS	-8.62791	-11.9472	-8.5626	-11.4561	-8.68962	-8.48766	-8.6595	-8.37245	-8.40105	-9.50361	-11.3759	-9.30931	1.24521
RPL13 vs RPS18	1.97216	1.76904	1.3318	1.70316	1.55463	1.11033	1.5848	0.839516	1.32894	4.23065	1.37307	1.16817	0.77085
RPL13 vs HPRT1	-4.60126	-5.87369	-5.3155	-5.28514	-4.98362	-4.95785	-5.18713	-5.07233	-4.91742	-2.88816	-5.06369	-5.0191	0.645877
RPL13 vs TMEM199	-4.81933	-7.08105	-7.42674	-6.68896	-6.32876	-6.37752	-7.00927	-7.22965	-6.581	-4.20043	-7.66521	-6.36542	0.974455
	CTR			6-OHDA			Rotenone			IFN-γ+glucose
	#1	#2	#3	#1	#2	#3	#1	#2	#3	#1	#2	#3	SD	SD Mean
RPS18 vs TBP	-10.084	-11.2996	-9.7351	-11.1383	-9.56281	-10.3604	-10.1311	-9.11784	-10.0102	-10.5475	-9.83278	-9.1068	0.599029	0.970845
RPS18 vs B2M	-3.81186	-3.72293	-2.61202	-3.62411	-2.68141	-2.13752	-2.4699	-1.83052	-2.22785	-3.26222	-2.8133	-2.52823	0.627264
RPS18 vs GAPDH	-0.558422	-1.84421	0.192706	-1.95945	0.137549	0.129882	-0.62278	-0.000520101	-0.185733	-1.35154	0.428353	0.418201	1.31353
RPS18 vs ACTB	-1.67954	-5.77528	-1.59391	-5.56009	-0.650429	-1.3292	-2.36302	-1.21987	-1.51592	-4.64289	-4.2761	-0.708986	1.74296
RPS18 vs YWHAZ	-7.58437	-10.0156	-7.00374	-9.77221	-6.87501	-7.59093	-7.78114	-7.56065	-7.13198	-9.45509	-7.32295	-6.83703	1.09162
RPS18 vs RPL13	-1.97216	-1.76904	-1.3318	-1.70316	-1.55463	-1.11033	-1.5848	-0.839516	-1.32894	-4.23065	-1.37307	-1.16817	0.77085
RPS18 vs HMBS	-10.6001	-13.7162	-9.8944	-13.1593	-10.2442	-9.59799	-10.2443	-9.21197	-9.72999	-13.7343	-12.749	-10.4775	1.51217
RPS18 vs HPRT1	-6.57342	-7.64272	-6.64729	-6.9883	-6.53825	-6.06818	-6.77192	-5.91185	-6.24636	-7.11881	-6.43676	-6.18727	0.452557
RPS18 vs TMEM199	-6.7915	-8.85009	-8.75854	-8.39211	-7.88338	-7.48785	-8.59407	-8.06916	-7.90994	-8.43108	-9.03828	-7.53359	0.627623
	CTR			6-OHDA			Rotenone			IFN-γ+glucose
	#1	#2	#3	#1	#2	#3	#1	#2	#3	#1	#2	#3	SD	SD Mean
TBP vs B2M	6.27211	7.57663	7.12308	7.5142	6.8814	8.22291	7.66121	7.28732	7.78232	7.28525	7.01948	6.57857	0.527164	0.822804
TBP vs GAPDH	9.52555	9.45535	9.92781	9.17886	9.70036	10.4903	9.50834	9.11732	9.82444	9.19593	10.2611	9.525	1.18556
TBP vs ACTB	8.40443	5.52428	8.14119	5.57822	8.91238	9.03122	7.7681	7.89797	8.49424	5.90458	5.55668	8.39781	1.31168
TBP vs YWHAZ	2.4996	1.28396	2.73136	1.36611	2.6878	2.76949	2.34998	1.55718	2.87819	1.09238	2.50983	2.26977	0.682211
TBP vs RPL13	8.11181	9.53053	8.4033	9.43516	8.00818	9.25009	8.54632	8.27832	8.68123	6.31681	8.45971	7.93863	0.755394
TBP vs HMBS	-0.516107	-2.41668	-0.1593	-2.02098	-0.681437	0.762439	-0.113185	-0.0941301	0.280179	-3.18679	-2.91618	-1.37068	1.21032
TBP vs RPS18	10.084	11.2996	9.7351	11.1383	9.56281	10.3604	10.1311	9.11784	10.0102	10.5475	9.83278	9.1068	0.599029
TBP vs HPRT1	3.51055	3.65684	3.08781	4.15002	3.02456	4.29225	3.35919	3.20599	3.76381	3.42866	3.39602	2.91953	0.388199
TBP vs TMEM199	3.29247	2.44948	0.976562	2.7462	1.67942	2.87257	1.53705	1.04868	2.10023	2.11639	0.7945	1.57321	0.745681
	CTR			6-OHDA			Rotenone			IFN-γ+glucose
	#1	#2	#3	#1	#2	#3	#1	#2	#3	#1	#2	#3	SD	SD Mean
TMEM199 vs TBP	-3.29247	-2.44948	-0.976562	-2.7462	-1.67942	-2.87257	-1.53705	-1.04868	-2.10023	-2.11639	-0.7945	-1.57321	0.745681	1.00423
TMEM199 vs B2M	2.97964	5.12716	6.14651	4.768	5.20197	5.35034	6.12417	6.23864	5.68209	5.16886	6.22498	5.00536	0.901987
TMEM199 vs GAPDH	6.23307	7.00588	8.95124	6.43266	8.02093	7.61773	7.97129	8.06864	7.72421	7.07954	9.46663	7.95179	1.1638
TMEM199 vs ACTB	5.11195	3.07481	7.16463	2.83202	7.23295	6.15865	6.23106	6.84929	6.39401	3.7882	4.76219	6.8246	1.5586
TMEM199 vs YWHAZ	-0.792873	-1.16552	1.75479	-1.38009	1.00838	-0.103078	0.812933	0.508507	0.777962	-1.02401	1.71533	0.696562	1.14147
TMEM199 vs RPL13	4.81933	7.08105	7.42674	6.68896	6.32876	6.37752	7.00927	7.22965	6.581	4.20043	7.66521	6.36542	0.974455
TMEM199 vs HMBS	-3.80858	-4.86616	-1.13586	-4.76718	-2.36086	-2.11013	-1.65023	-1.14281	-1.82005	-5.30318	-3.71068	-2.94389	1.30266
TMEM199 vs RPS18	6.7915	8.85009	8.75854	8.39211	7.88338	7.48785	8.59407	8.06916	7.90994	8.43108	9.03828	7.53359	0.627623
TMEM199 vs HPRT1	0.218073	1.20736	2.11124	1.40382	1.34514	1.41968	1.82215	2.15732	1.66358	1.31227	2.60152	1.34632	0.621755
	CTR			6-OHDA			Rotenone			IFN-γ+glucose
	#1	#2	#3	#1	#2	#3	#1	#2	#3	#1	#2	#3	SD	SD Mean
YWHAZ vs TBP	-2.4996	-1.28396	-2.73136	-1.36611	-2.6878	-2.76949	-2.34998	-1.55718	-2.87819	-1.09238	-2.50983	-2.26977	0.682211	1.00318
YWHAZ vs B2M	3.77251	6.29267	4.39172	6.1481	4.19359	5.45341	5.31124	5.73014	4.90413	6.19287	4.50965	4.3088	0.812369
YWHAZ vs GAPDH	7.02595	8.17139	7.19645	7.81275	7.01256	7.72081	7.15836	7.56013	6.94624	8.10355	7.7513	7.25523	1.52167
YWHAZ vs ACTB	5.90483	4.24032	5.40984	4.21212	6.22458	6.26173	5.41812	6.34078	5.61605	4.8122	3.04685	6.12804	0.909275
YWHAZ vs RPL13	5.6122	8.24657	5.67195	8.06905	5.32038	6.4806	6.19634	6.72114	5.80304	5.22444	5.94987	5.66886	0.907445
YWHAZ vs HMBS	-3.01571	-3.70064	-2.89066	-3.38709	-3.36924	-2.00706	-2.46316	-1.65131	-2.59801	-4.27917	-5.42602	-3.64045	1.15503
YWHAZ vs RPS18	7.58437	10.0156	7.00374	9.77221	6.87501	7.59093	7.78114	7.56065	7.13198	9.45509	7.32295	6.83703	1.09162
YWHAZ vs HPRT1	1.01095	2.37288	0.356449	2.78391	0.336758	1.52275	1.00922	1.64881	0.885616	2.33628	0.886182	0.64976	0.807567
YWHAZ vs TMEM199	0.792873	1.16552	-1.75479	1.38009	-1.00838	0.103078	-0.812933	-0.508507	-0.777962	1.02401	-1.71533	-0.696562	1.14147

## Sheet: S5
Column data	TBP	B2M	GAPDH	ACTB	YWHAZ	RPL13	HMBS	RPS18	HPRT1	TMEM199	BestKeeper
n	12	12	12	12	12	12	12	12	12	12	12
geo Mean [CP]	23.5275	16.3857	14.3857	15.7103	21.2742	15.3025	24.6942	13.6645	20.2457	21.7132	18.2979
ar Mean [CP]	23.5345	16.3911	14.4512	15.7651	21.2916	15.3201	24.7261	13.6676	20.2474	21.7247	18.306
min [CP]	22.7437	15.8686	13.1733	14.3005	20.4285	14.7597	23.5368	13.3099	19.7788	20.2996	17.6909
max [CP]	24.8567	17.32	18.9522	19.009	23.2212	17.7781	27.2817	14.2302	20.6663	23.295	19.3937
SD [± CP]	0.491282	0.339419	0.98432	0.960704	0.646451	0.436361	1.08811	0.255363	0.238886	0.518147	0.456311
CV [% CP]	2.08749	2.07075	6.81133	6.09386	3.03618	2.84829	4.40066	1.86838	1.17983	2.38505	2.49269

## Sheet: S6
a)
	CTR			6-OHDA			Rotenone			IFN-γ+glucose
	#1	#2	#3	#1	#2	#3	#1	#2	#3	#1	#2	#3
ACTB	0.837973	0.745716	1	0.434123	0.23116	0.719727	0.494536	0.866037	0.591115	0.399995	0.722244	0.421246
B2M	0.36567	0.722313	0.692693	0.433932	0.865882	0.74716	1	0.864893	0.799278	0.520845	0.840233	0.833721
GAPDH	0.538402	0.779238	0.776776	0.212408	0.643651	0.0182128	0.555491	0.549967	0.57173	0.302354	1	0.564547
HMBS	0.540672	0.493359	0.950646	0.0382462	0.511375	0.674433	0.363187	0.477778	0.385455	0.0674591	1	0.339215
HPRT1	0.631144	0.811642	0.930295	0.144324	0.466118	0.962929	0.594069	0.68132	0.62273	0.167937	1	0.583681
RPL13	0.606838	0.813379	0.787848	0.761848	0.81819	0.731497	0.856297	0.747724	0.994027	0.123413	1	0.678612
RPS18	0.672972	0.943795	0.348025	0.118963	1	0.129692	0.92905	0.970418	0.0745892	0.0745892	0.691518	0.52738
TBP	0.871644	0.749532	1	0.908144	0.64667	0.528406	0.940334	0.687667	0.981613	0.848206	0.822695	0.568249
TMEM199	0.810692	0.662322	0.908817	0.633552	0.853677	0.593459	0.762156	0.802325	0.620473	0.540556	1	0.631357
YWHAZ	1	0.219944	0.551461	0.343543	0.457846	0.125405	0.309252	0.363374	0.433614	0.312318	0.564296	0.346123
b)
Gene name	Stability value	Standard error		Final ranking
ACTB	0.759735	0.171549		HPRT1
B2M	0.371651	0.102007		B2M
GAPDH	0.943913	0.208075		YWHAZ
HMBS	0.845837	0.188501		RPS18
HPRT1	0.195307	0.0867081		RPL13
RPL13	0.437218	0.112222		TBPnew
RPS18	0.423645	0.110015		TMEM199
TBP	0.447403	0.113904		ACTB
TMEM199	0.483437	0.120014		HMBS
YWHAZ	0.418356	0.109167		GAPDH
